# Supplementary material
Source: ML conference proceedings conference paper supplement (https://proceedings.neurips.cc/paper_files/paper/2021/hash/9cdf26568d166bc6793ef8da5afa0846-Abstract.html)
Supplement: Supplementary file 1 [file 9cdf26568d166bc6793ef8da5afa0846-Supplemental.pdf]

# Convergence Rates of Stochastic Gradient Descent under Infinite Noise Variance

## SUPPLEMENTARY DOCUMENT

### A Lemmas and Discussions

#### A.1 Key Lemmas

In this subsection, we present some key lemmas used in the proof of our main theorems, which are helpful when considering stochastic problems with *infinite* variance.

The concept of *uncorrelatedness* has long been used by probabilists as a trick when computing and estimating variance. For example, consider a sequence of uncorrelated random vectors  $\{\mathbf{X}_t\}_{t \in \mathbb{N}^+}$  (e.g. square-integrable martingale difference). Then

$$\mathbb{E}[|\mathbf{X}_1 + \dots + \mathbf{X}_t|^2] = \mathbb{E}[|\mathbf{X}_1|^2] + \dots + \mathbb{E}[|\mathbf{X}_t|^2]. \quad (\text{A.1})$$

Indeed, this type of expansion is used in [Polyak and Juditsky \[1992\]](#) to show  $L^2$  convergence in the normality analysis of stochastic approximation problems.

However, correlatedness is *only* defined when random elements have *finite* variance. The following lemma provides an infinite-variance version of expansion (A.1), stating that the  $p$ -th moment ( $p < 2$ ) of a martingale without square-integrability assumption can also be bounded *simpliciter* by the sum of the  $p$ -th moments of its differences, at the cost of a multiplicative constant that may depend only on  $p$  and the dimension  $n$ . It is a generalization of the recent study [Cherapanamjeri et al. \[2020, Lemma 4.2\]](#).

**Lemma 7.** *Suppose  $p \in [0, 1]$  and let  $\{\mathbf{S}_t\}_{t \in \mathbb{N}}$  be an  $n$ -dimensional martingale adapted to the filtration  $\{\mathcal{F}_t\}_{t \in \mathbb{N}}$ , with  $\mathbb{E}[|\mathbf{S}_t|^{1+p}] < \infty$  for every  $t$  and  $\mathbf{S}_0 = 0$ . Let  $\mathbf{X}_i = \mathbf{S}_i - \mathbf{S}_{i-1}$ . Then*

$$\mathbb{E}[|\mathbf{S}_t|^{1+p}] \leq 2^{1-p} n^{1-\frac{1+p}{2}} \sum_{i=1}^t \mathbb{E}[|\mathbf{X}_i|^{1+p}].$$

Next, we present a Taylor-expansion-type inequality for the function  $\|\mathbf{x}\|_p^p$ . Recall that we have defined the signed power of a vector in (3.1).

**Lemma 8.** *Let  $p \in [1, 2]$ . For any  $\mathbf{x}, \mathbf{y} \in \mathbb{R}^n$ ,  $\|\mathbf{x} + \mathbf{y}\|_p^p \leq \|\mathbf{x}\|_p^p + 4\|\mathbf{y}\|_p^p + p\mathbf{y}^\top \mathbf{x}^{(p-1)}$ .*

This inequality traces back to [Krasulina \[1969\]](#), where the one-dimensional version  $|x + y|^p \leq |x|^p + C|y|^p + pyx^{p-1} \text{sign}(x)$  is used<sup>3</sup> to derive an  $L^p$  rate of convergence for the one-dimensional stochastic approximation process with step-size  $1/t$ . In our current study, this lemma is used not only to derive  $L^p$  rate of convergence for general infinite-variance process in  $\mathbb{R}^n$  with variable step-size scheme (Theorem 3), but also in the proof of the equivalent definitions of  $p$ -PD (Theorem 10).

Finally, we quote [Fabian \[1967, Lemma 4.2\]](#), which we shall use to calculate the exact convergence rate (see also [Chung \[1954\]](#)).

**Lemma 9** ([Fabian \[1967\]](#), Lemma 4.2). *Let  $\{b_t\}_{t \in \mathbb{N}}$ ,  $A, B, \alpha, \beta$  be real numbers such that  $0 < \alpha < 1$ ,  $A > 0$  and suppose the recursion*

$$b_{t+1} = b_t(1 - At^{-\alpha}) + Bt^{-\alpha-\beta}$$

*holds. Then,  $b_t = \Theta(t^{-\beta})$ .*

#### A.2 Discussions on $p$ -Positive Definiteness and Uniform $p$ -Positive Definiteness

Let us now focus on  $p$ -PD and uniform  $p$ -PD conditions which are defined in Definition 1, Definition 2 (also see Assumption 1). The next theorem provides several equivalent characterizations of  $p$ -PD condition, which will be used in the proof of  $L^p$  convergence.

<sup>3</sup>The paper [Krasulina \[1969\]](#) contains a minor error in ignoring the signum function  $\text{sign}(x)$  in this inequality. Our proof of Theorem 3 can be thought of its correction as well as extension.

**Theorem 10** (Equivalent definitions of  $p$ -PD). *Let  $\mathbf{Q}$  be a symmetric matrix. The following are equivalent when  $p \in [1, 2]$ .*

- i) *There exist  $\delta, L > 0$ , such that  $\|\mathbf{I} - t\mathbf{Q}\|_p^p \leq 1 - Lt$  for all  $t \in [0, \delta]$ .*
- ii) *There exists  $\lambda > 0$  such that for all  $\mathbf{v} \in \mathbb{R}^n$ ,  $\mathbf{v}^\top \mathbf{Q} \mathbf{v}^{(p-1)} \geq \lambda \|\mathbf{v}\|_p^p$ .*
- iii) *For all  $\mathbf{v} \in S_p$ ,  $\mathbf{v}^\top \mathbf{Q} \mathbf{v}^{(p-1)} > 0$ .*
- iv) *For all  $\mathbf{v} \in S_p$ , there exists  $t_0 > 0$  such that  $\|\mathbf{v} - t_0 \mathbf{Q} \mathbf{v}\|_p < 1$ .*

Next, we provide several equivalent characterizations of uniform  $p$ -PD.

**Theorem 11** (Equivalent definitions of uniform  $p$ -PD). *Let  $\mathcal{M}$  be a bounded set of symmetric matrices. The following are equivalent when  $p \in [1, 2]$ .*

- i) *There exist  $\delta, L > 0$ , such that  $\|\mathbf{I} - t\mathbf{Q}\|_p^p \leq 1 - Lt$  for all  $t \in [0, \delta]$  and  $\mathbf{Q} \in \mathcal{M}$ .*
- ii) *There exists  $\lambda > 0$  such that for all  $\mathbf{v} \in \mathbb{R}^n$  and  $\mathbf{Q} \in \mathcal{M}$ ,  $\mathbf{v}^\top \mathbf{Q} \mathbf{v}^{(p-1)} \geq \lambda \|\mathbf{v}\|_p^p$ .*
- iii) *For all  $\mathbf{v} \in S_p$  and  $\mathbf{Q} \in \overline{\mathcal{M}}$ ,  $\mathbf{v}^\top \mathbf{Q} \mathbf{v}^{(p-1)} > 0$ .*
- iv) *For all  $\mathbf{v} \in S_p$  and  $\mathbf{Q} \in \overline{\mathcal{M}}$ , there exists  $t_0 > 0$  such that  $\|\mathbf{v} - t_0 \mathbf{Q} \mathbf{v}\|_p < 1$ .*

We notice that some mild assumptions can indeed imply  $p$ -PD. For example, we will show that diagonal dominance implies  $p$ -PD. Recall that a symmetric matrix  $\mathbf{Q} = (q_{ij})_{n \times n}$  is called diagonally dominant (with non-negative diagonal) if for every  $i \in [n]$ ,

$$q_{ii} - \sum_{j \in [n] \setminus \{i\}} |q_{ij}| > 0.$$

Further, we say that a non-empty set  $\mathcal{M}$  of symmetric matrices is *uniformly diagonally dominant* (with non-negative diagonal) if

$$\inf_{(q_{ij})_{n \times n} \in \mathcal{M}} \min_{i \in [n]} \left( q_{ii} - \sum_{j \in [n] \setminus \{i\}} |q_{ij}| \right) > 0.$$

We have the following observations which we shall prove in Section B. First, we observe that the uniform  $p$ -PD assumption is weaker than the notion of uniform diagonally dominance (with non-negative diagonal).

**Proposition 12.** *A uniformly diagonally dominant (with non-negative diagonal) set of symmetric matrices is uniformly  $p$ -PD for every  $p \in [1, 2]$ .*

Next, we notice that the result in Proposition 12 is tight for  $p = 1$ .

**Proposition 13.** *Uniform 1-PD is equivalent to uniform diagonal dominance (with non-negative diagonal).*

Finally, we observe that the notion of uniform 2-PD is weaker than uniform  $p$ -PD for any  $p \in [1, 2]$ .

**Proposition 14.** *Let  $p \in [1, 2]$ . Uniform  $p$ -PD implies uniform 2-PD.*

## B Omitted Proofs

In this section, we first prove the lemmas, theorems, and propositions in Section A, then prove the theorems in Sections 3 and 4. Throughout this section, we denote by  $\delta_t$  the error of the approximation  $\mathbf{x}_t - \mathbf{x}^*$ , and by  $\bar{\delta}_t$  the averaged error  $(\delta_0 + \dots + \delta_{t-1})/t$ . The gradient  $\nabla f(\mathbf{x})$  and the Hessian  $\nabla^2 f(\mathbf{x})$  will be written as  $\mathbf{R}(\mathbf{x})$  and  $\nabla \mathbf{R}(\mathbf{x})$  respectively, not only for notational simplicity, but also to stress the fact that our results can be applied to any instance of stochastic approximation (2.1) including SGD.

**Proof of Lemma 7** We first prove the  $n = 1$  case. Suppose  $\{S_t\}$  is a one-dimensional martingale and  $X_i = S_i - S_{i-1}$ . Notice that the function  $g(x) = |x|^{1+p}$  satisfies the inequality (see e.g. Cherapanamjeri et al. [2020, Lemma A.3]):

$$|g'(x) - g'(y)| \leq 2^{1-p} g'(|x - y|),$$

where the weak derivative  $g'(x) = \text{sign}(x)$  is used in the inequality above in the case of  $p = 0$ , where

$$\text{sign}(x) := \begin{cases} 1 & \text{if } x > 0, \\ -1 & \text{if } x < 0, \\ 0 & \text{if } x = 0. \end{cases}$$

Furthermore, by  $\mathbb{E}[X_i g'(S_{i-1}) | \mathcal{F}_{i-1}] = g'(S_{i-1}) \mathbb{E}[X_i | \mathcal{F}_{i-1}] = 0$ , we have

$$\begin{aligned} \mathbb{E}[g(S_t)] &= \sum_{i=1}^t \mathbb{E} \left[ \int_{S_{i-1}}^{S_i} g'(x) dx \right] \\ &= \sum_{i=1}^t \mathbb{E} \left[ X_i g'(S_{i-1}) + \int_{S_{i-1}}^{S_i} [g'(x) - g'(S_{i-1})] dx \right] \\ &= \sum_{i=1}^t \mathbb{E} \left[ \int_{S_{i-1}}^{S_i} [g'(x) - g'(S_{i-1})] dx \right] \\ &= \sum_{i=1}^t \mathbb{E} \left[ \int_0^{X_i} [g'(S_{i-1} + \tau) - g'(S_{i-1})] d\tau \right] \\ &= \sum_{i=1}^t \mathbb{E} \left[ \int_0^{|X_i|} |g'(S_{i-1} + \text{sign}(X_i)\tau) - g'(S_{i-1})| d\tau \right] \\ &\leq 2^{1-p} \sum_{i=1}^t \mathbb{E} \left[ \int_0^{|X_i|} g'(\tau) d\tau \right] \\ &= 2^{1-p} \sum_{i=1}^t \mathbb{E}[g(|X_i|)]. \end{aligned} \tag{B.1}$$

Next, for the higher dimension  $n > 1$ , we denote by  $S_i^j$  (resp.  $X_i^j$ ) the  $j$ -th entry of the vector  $S_i$  (resp.  $X_i$ ). We can apply the inequality (B.1) obtained above to  $S_i^j$  by taking a  $(1+p)$ -norm,

$$\begin{aligned} \mathbb{E} \left[ \|\mathbf{S}_t\|_{1+p}^{1+p} \right] &= \sum_{j=1}^n \mathbb{E} \left[ |S_t^j|^{1+p} \right] \\ &\leq \sum_{j=1}^n 2^{1-p} \sum_{i=1}^t \mathbb{E} \left[ |X_i^j|^{1+p} \right] \\ &= 2^{1-p} \sum_{i=1}^t \sum_{j=1}^n \mathbb{E} \left[ |X_i^j|^{1+p} \right] \\ &= 2^{1-p} \sum_{i=1}^t \mathbb{E} \left[ \|\mathbf{X}_i\|_{1+p}^{1+p} \right]. \end{aligned}$$

Finally, the inequalities

$$|\mathbf{x}| \leq \|\mathbf{x}\|_{1+p} \leq n^{\frac{1}{1+p} - \frac{1}{2}} |\mathbf{x}|$$

give our desired result:

$$\mathbb{E} \left[ |\mathbf{S}_t|^{1+p} \right] \leq 2^{1-p} n^{1 - \frac{1+p}{2}} \sum_{i=1}^t \mathbb{E} \left[ |\mathbf{X}_i|^{1+p} \right].$$

The proof is complete.  $\square$

**Proof of Lemma 8** By the inequality that  $|1 + a|^p \leq 1 + ap + 4|a|^p$  for any  $p \in [1, 2]$  and  $a \in \mathbb{R}$ , we have that for any  $p \in [1, 2]$  and  $x, y \in \mathbb{R}$ ,

$$|x + y|^p \leq |x|^p + py|x|^{p-1} \text{sign}(x) + 4|y|^p. \quad (\text{B.2})$$

Next, for any  $\mathbf{x} = (x^1, \dots, x^n)^\top, \mathbf{y} = (y^1, \dots, y^n)^\top \in \mathbb{R}^n$ , by taking the  $p$ -norm and applying the inequality (B.2), we obtain

$$\begin{aligned} \|\mathbf{x} + \mathbf{y}\|_p^p &= \sum_{i=1}^n |x^i + y^i|^p \\ &\leq \sum_{i=1}^n \left( |x^i|^p + py^i |x^i|^{p-1} \text{sign}(x^i) + 4|y^i|^p \right) \\ &= \|\mathbf{x}\|_p^p + 4\|\mathbf{y}\|_p^p + p \sum_{i=1}^n y^i |x^i|^{p-1} \text{sign}(x^i) \\ &= \|\mathbf{x}\|_p^p + 4\|\mathbf{y}\|_p^p + p\mathbf{y}^\top \mathbf{x}^{(p-1)}, \end{aligned}$$

which completes the proof.  $\square$

Since Theorem 10 is just a special case of Theorem 11, we will only prove the latter. Before we proceed, let us first state a useful technical lemma.

**Lemma 15.** *Let  $\mathbf{u}, \mathbf{v} \in \mathbb{R}^n$  and consider the function  $\varphi(t) = \|\mathbf{u} + t\mathbf{v}\|_p^p = \sum_{i=1}^n |u^i + v^i t|^p$ . The function  $\varphi$  is convex and has the following derivative (when  $1 < p \leq 2$ ) or subderivative (when  $p = 1$ ):*

$$\varphi'(t) = \sum_{i=1}^n p |u^i + v^i t|^{p-1} \text{sign}(u^i + v^i t) v^i = p\mathbf{v}^\top (\mathbf{u} + t\mathbf{v})^{(p-1)}.$$

The proof of Lemma 15 is straightforward and is hence omitted here.

Now we are ready to prove Theorem 11.

**Proof of Theorem 11** We shall show that i)  $\implies$  iv)  $\implies$  iii)  $\implies$  ii)  $\implies$  i).

i)  $\implies$  iv) Take a sequence  $\{\mathbf{Q}_1, \mathbf{Q}_2, \dots\} \subseteq \mathcal{M}$  such that  $\lim_{m \rightarrow \infty} \mathbf{Q}_m = \mathbf{Q}$ . iv) follows from  $\|\mathbf{I} - (\delta/2)\mathbf{Q}_m\|_p^p \leq 1 - L\delta/2$ .

iv)  $\implies$  iii) For all  $\mathbf{v} \in S_p$  and  $\mathbf{Q} \in \overline{\mathcal{M}}$ , consider the function  $\varphi(t) = \|\mathbf{v} - t\mathbf{Q}\mathbf{v}\|_p^p$ . According to Lemma 15,  $\varphi(t)$  is convex. Furthermore,  $\varphi(t_0) < 1 = \varphi(0)$ . Hence it follows that  $\varphi'(0) < 0$ ; that is,  $\mathbf{v}^\top \mathbf{Q}\mathbf{v}^{(p-1)} > 0$ .

iii)  $\implies$  ii) Since the function  $(\mathbf{v}, \mathbf{Q}) \mapsto \mathbf{v}^\top \mathbf{Q}\mathbf{v}^{(p-1)}$  is continuous, it maps the compact set  $S_p \times \overline{\mathcal{M}}$  to a compact set. Hence there exists some  $\lambda > 0$  such that for all  $\mathbf{v} \in S_p$  and  $\mathbf{Q} \in \overline{\mathcal{M}}$ ,  $\mathbf{v}^\top \mathbf{Q}\mathbf{v}^{(p-1)} \geq \lambda$ . Now, for every  $\mathbf{u} \in \mathbb{R}^n \setminus \{0\}$ , by setting  $\mathbf{v} = \mathbf{u}/\|\mathbf{u}\|_p$ , we get  $\mathbf{u}^\top \mathbf{Q}\mathbf{u}^{(p-1)} \geq \lambda\|\mathbf{u}\|_p^p$ .

ii)  $\implies$  i) For arbitrary  $\mathbf{v} \in \mathbb{R}^n$  and  $\mathbf{Q} \in \mathcal{M}$ , by Lemma 8 we have  $\|(\mathbf{I} - t\mathbf{Q})\mathbf{v}\|_p^p = \|\mathbf{v} - t\mathbf{Q}\mathbf{v}\|_p^p \leq \|\mathbf{v}\|_p^p + 4t^p \|\mathbf{Q}\mathbf{v}\|_p^p - pt(\mathbf{v}^\top \mathbf{Q}\mathbf{v}^{(p-1)}) \leq \|\mathbf{v}\|_p^p + 4t^p \|\mathbf{Q}\|_p^p \|\mathbf{v}\|_p^p - pt\lambda\|\mathbf{v}\|_p^p$ . This implies i).

The proof is complete.  $\square$

**Proof of Proposition 12** Let  $\mathbf{Q} \in \mathcal{M}$  and  $\mathbf{v} \in \mathbb{R}^n$ .

$$\begin{aligned}
\mathbf{v}^\top \mathbf{Q} \mathbf{v}^{\langle p-1 \rangle} &= \sum_{i=1}^n q_{ii} |v^i|^p + \sum_{i<j} q_{ij} (v^i |v^j|^{p-1} \text{sign}(v^j) + v^j |v^i|^{p-1} \text{sign}(v^i)) \\
&\geq \sum_{i=1}^n q_{ii} |v^i|^p - \sum_{i<j} |q_{ij}| (|v^i| |v^j|^{p-1} + |v^j| |v^i|^{p-1}) \\
&\geq \sum_{i=1}^n q_{ii} |v^i|^p - \sum_{i<j} |q_{ij}| (|v^i|^p + |v^j|^p) \\
&= \sum_{i=1}^n |v^i|^p \left( q_{ii} - \sum_{j \neq i} |q_{ij}| \right),
\end{aligned}$$

where we used the inequality  $x^p + y^p \geq x^{p-1}y + y^{p-1}x$  for any  $p \geq 1$  and  $x, y \geq 0$ <sup>4</sup> to get the third line from the second line above. Hence the uniform  $p$ -PD of  $\mathcal{M}$  follows from the item ii) of Theorem 11. The proof is complete.  $\square$

**Proof of Proposition 13** Suppose  $\mathcal{M}$  is uniform 1-PD. By the item i) of Theorem 11, there exists  $\delta, L > 0$  such that  $\|\mathbf{I} - t\mathbf{Q}\|_1 \leq 1 - Lt$  for all  $t \in [0, \delta)$  and  $\mathbf{Q} \in \mathcal{M}$ . Let  $\mathbf{Q} = (q_{ij})_{n \times n}$  and notice that

$$\|\mathbf{I} - t\mathbf{Q}\|_1 = \max_{i \in [n]} \left( |1 - tq_{ii}| + \sum_{j \in [n] \setminus \{i\}} t|q_{ij}| \right).$$

It follows that

$$\min_{i \in [n]} \left( q_{ii} - \sum_{j \in [n] \setminus \{i\}} |q_{ij}| \right) \geq L > 0.$$

Hence  $\mathcal{M}$  is uniformly diagonally dominant (with non-negative diagonal). The proof is complete.  $\square$

**Proof of Proposition 14** Suppose  $\mathcal{M}$  is uniformly  $p$ -PD but not uniformly 2-PD. Then, there exists a sequence  $\{\mathbf{Q}_1, \mathbf{Q}_2, \dots\} \subseteq \mathcal{M}$  such that the smallest eigenvalues  $\lambda_m$  of  $\mathbf{Q}_m$  satisfy

$$\lim_{m \rightarrow \infty} \lambda_m \leq 0. \quad (\text{B.3})$$

For each  $m \in \mathbb{N}^+$ , there exists an  $\mathbf{v}_m \in \mathbb{R}^n \setminus \{0\}$  such that  $\mathbf{Q}_m \mathbf{v}_m = \lambda_m \mathbf{v}_m$ . Hence

$$\mathbf{v}_m^\top \mathbf{Q}_m \mathbf{v}_m^{\langle p-1 \rangle} = \lambda_m \mathbf{v}_m^\top \mathbf{v}_m^{\langle p-1 \rangle} = \lambda_m \|\mathbf{v}_m\|_p^p.$$

But by the item ii) of Theorem 11, there exists  $\lambda > 0$  such that  $\lambda_m \geq \lambda$ . This contradicts (B.3). The proof is complete.  $\square$

**Proof of Theorem 3** We use a technique similar to Krasulina [1969]. Define the function

$$\mathbf{T}_t(\mathbf{x}) = (T_t^1(\mathbf{x}), \dots, T_t^n(\mathbf{x}))^\top = \mathbf{x} - \mathbf{x}^* - \gamma_{t+1} \mathbf{R}(\mathbf{x}).$$

An  $n$ -dimensional (and corrected) version of the first inequality in the proof of Krasulina [1969, Theorem 2] can be obtained by applying Lemma 8 to our stochastic approximation scheme,

$$\begin{aligned}
\|\mathbf{x}_{t+1} - \mathbf{x}^*\|_p^p &= \|\mathbf{T}_t(\mathbf{x}_t) - \gamma_{t+1} \boldsymbol{\xi}_{t+1}\|_p^p \\
&\leq \|\mathbf{T}_t(\mathbf{x}_t)\|_p^p + 4\gamma_{t+1}^p \|\boldsymbol{\xi}_{t+1}\|_p^p + p\gamma_{t+1} \sum_{i=1}^n \xi_{t+1}^i |T_t^i(\mathbf{x}_t)|^{p-1} \text{sign } T_t^i(\mathbf{x}_t). \quad (\text{B.4})
\end{aligned}$$

Since  $\mathbb{E}[\xi_{t+1}^i | T_t^i(\mathbf{x}_t)|^{p-1} \text{sign } T_t^i(\mathbf{x}_t) | \mathbf{x}_t] = |T_t^i(\mathbf{x}_t)|^{p-1} \text{sign } T_t^i(\mathbf{x}_t) \mathbb{E}[\xi_{t+1}^i | \mathbf{x}_t] = 0$ , by taking expectations in (B.4), we get

$$\begin{aligned}
\mathbb{E}[\|\boldsymbol{\delta}_{t+1}\|_p^p] &= \mathbb{E}[\|\mathbf{x}_{t+1} - \mathbf{x}^*\|_p^p] \\
&\leq \mathbb{E}[\|\mathbf{T}_t(\mathbf{x}_t)\|_p^p] + 4\gamma_{t+1}^p \mathbb{E}[\|\boldsymbol{\xi}_{t+1}\|_p^p] \\
&= \mathbb{E}[\|(\mathbf{x}_t - \mathbf{x}^*) - \gamma_{t+1} \mathbf{R}(\mathbf{x}_t)\|_p^p] + 4\gamma_{t+1}^p \mathbb{E}[\|\boldsymbol{\xi}_{t+1}\|_p^p].
\end{aligned}$$

<sup>4</sup>To see this, notice that for any  $p \geq 1$  and  $x, y \geq 0$ ,  $x^p + y^p - x^{p-1}y - y^{p-1}x = (x^{p-1} - y^{p-1})(x - y) \geq 0$ .

By the mean value theorem, there exists  $\mathbf{x}_t^b \in \{\mathbf{x}^* + \tau(\mathbf{x}_t - \mathbf{x}^*) : 0 \leq \tau \leq 1\}$ , such that  $\mathbf{R}(\mathbf{x}_t) = \nabla \mathbf{R}(\mathbf{x}_t^b)(\mathbf{x}_t - \mathbf{x}^*)$ , and then

$$\begin{aligned} & \mathbb{E} \left[ \|\mathbf{x}_t - \mathbf{x}^*\|_p^p - \gamma_{t+1} \mathbf{R}(\mathbf{x}_t) \|_p^p \right] + 4\gamma_{t+1}^p \mathbb{E} \left[ \|\boldsymbol{\xi}_{t+1}\|_p^p \right] \\ &= \mathbb{E} \left[ \left\| (\mathbf{I} - \gamma_{t+1} \nabla \mathbf{R}(\mathbf{x}_t^b)) (\mathbf{x}_t - \mathbf{x}^*) \right\|_p^p \right] + 4\gamma_{t+1}^p \mathbb{E} \left[ \|\boldsymbol{\xi}_{t+1}\|_p^p \right] \\ &\leq \mathbb{E} \left[ \left\| \mathbf{I} - \gamma_{t+1} \nabla \mathbf{R}(\mathbf{x}_t^b) \right\|_p^p \cdot \|\mathbf{x}_t - \mathbf{x}^*\|_p^p \right] + 4\gamma_{t+1}^p \mathbb{E} \left[ \|\boldsymbol{\xi}_{t+1}\|_p^p \right] \\ &\leq \mathbb{E} \left[ \left\| \mathbf{I} - \gamma_{t+1} \nabla \mathbf{R}(\mathbf{x}_t^b) \right\|_p^p \cdot \|\boldsymbol{\delta}_t\|_p^p \right] + C_0 \gamma_{t+1}^p (1 + \mathbb{E}[\|\boldsymbol{\delta}_t\|_p^p]), \end{aligned}$$

where the last inequality follows from

$$\begin{aligned} \mathbb{E}[\|\mathbf{m}_{t+1}\|_p^p \mid \mathcal{F}_t] &\leq \mathbb{E} \left[ \|\mathbf{m}_{t+1}\|_2^2 \mid \mathcal{F}_t \right]^{p/2} \leq [K(1 + |\mathbf{x}_t|^2)]^{p/2} \\ &\leq K^{p/2} (1 + |\mathbf{x}_t|^p) \leq K^{p/2} (1 + 2^{p-1} (\|\boldsymbol{\delta}_t\|_p^p + |\mathbf{x}^*|^p)), \end{aligned} \quad (\text{B.5})$$

where we used the inequality  $(x + y)^r \leq x^r + y^r$  for any  $x, y \geq 0$ ,  $0 \leq r \leq 1$  to obtain the first inequality in the second line above, as well as the assumption  $\mathbb{E}[\|\boldsymbol{\zeta}_1\|_p^p] < \infty$ .

Note that  $\left\| \mathbf{I} - \gamma_{t+1} \nabla \mathbf{R}(\mathbf{x}_t^b) \right\|_p^p$  can be estimated by the uniform  $p$ -PD assumption (see item i) of Theorem 11) since  $\gamma_t \rightarrow 0$ . For  $t$  sufficiently large,

$$\left\| \mathbf{I} - \gamma_{t+1} \nabla \mathbf{R}(\mathbf{x}_t^b) \right\|_p^p \leq 1 - L\gamma_{t+1}.$$

And there is a positive constant  $C_1$  such that  $1 - L\gamma_{t+1} + C_0\gamma_{t+1}^p \leq 1 - C_1\gamma_{t+1}$  for  $t$  sufficiently large. Hence, we arrive at the following iterative bound

$$\mathbb{E} \left[ \|\boldsymbol{\delta}_{t+1}\|_p^p \right] \leq (1 - \gamma_{t+1} C_1) \cdot \mathbb{E} \left[ \|\boldsymbol{\delta}_t\|_p^p \right] + C_0 \gamma_{t+1}^p \quad (\text{B.6})$$

for  $t$  sufficiently large.

Next, let us substitute  $\gamma_{t+1}$  with  $t^{-\rho}$  where  $0 < \rho < 1$ . Consider the iteration

$$\mu_{t+1} = (1 - t^{-\rho} C_1) \cdot \mu_t + C_0 t^{-\rho p}, \quad (\text{B.7})$$

so that by (B.6),  $\mathbb{E}[\|\boldsymbol{\delta}_t\|_p^p] = \mathcal{O}(\mu_t)$ . By virtue of Lemma 9, we get

$$\mu_t = \Theta \left( t^{-\rho(p-1)} \right). \quad (\text{B.8})$$

Therefore, by (B.6), (B.7), and (B.8), we obtain the following rate of convergence:

$$\mathbb{E}[\|\boldsymbol{\delta}_t\|_p^p] = \mathcal{O} \left( t^{-\rho(p-1)} \right).$$

Next, since  $p$ -norms on  $\mathbb{R}^n$  are all equivalent, we can drop the subscript  $\|\cdot\|_p$  and obtain

$$\mathbb{E}[\|\boldsymbol{\delta}_t\|^p] = \mathcal{O} \left( t^{-\rho(p-1)} \right).$$

Finally, by (B.5), we see that  $\sup_{t \in \mathbb{N}^+} \mathbb{E}[\|\boldsymbol{\xi}_t\|^p] \leq \sup_{t \in \mathbb{N}^+} \mathbb{E}[2^{p-1} (|\mathbf{m}_t|^p + |\boldsymbol{\zeta}_t|^p)] < \infty$ . The proof is complete.  $\square$

**Proof of Corollary 4** Under the assumptions of Corollary 4, the rate  $\mathbb{E}[\|\boldsymbol{\delta}_t\|^p] = \mathcal{O}(t^{-\rho(p-1)})$  holds for every  $p \in [q, \alpha]$ . We can thus apply Jensen's inequality to strengthen it. By Jensen's inequality and (3.4), we get

$$\mathbb{E}[\|\boldsymbol{\delta}_t\|^q] \leq \mathbb{E}[\|\boldsymbol{\delta}_t\|^p]^{q/p} = \mathcal{O} \left( t^{-\rho(p-1) \frac{q}{p}} \right).$$

By letting  $p \nearrow \alpha$ , we conclude that have for every  $\varepsilon > 0$ ,

$$\mathbb{E}[\|\boldsymbol{\delta}_t\|^q] = o \left( t^{-\rho q \frac{\alpha-1}{\alpha} + \varepsilon} \right).$$

The proof is complete.  $\square$

Next, we state a series of technical lemmas as well as their proofs, which will be used in the proofs of Theorems 5 and 6.

**Lemma 16.** If  $\gamma_t \asymp t^{-\rho}$  with  $0 < \rho < \kappa \leq 1$ , then for all  $\lambda > 0$ ,

$$\lim_{t \rightarrow \infty} t^{-\kappa} \sum_{j=1}^{t-1} \exp\left(-\lambda \sum_{i=j}^{t-1} \gamma_i\right) = 0.$$

**Proof.** Notice that there exists some constant  $B > 0$  such that

$$\sum_{i=j}^{t-1} \gamma_i \geq \frac{B}{\lambda} (t^{1-\rho} - j^{1-\rho}).$$

It follows that

$$t^{-\kappa} \sum_{j=1}^{t-1} \exp\left(-\lambda \sum_{i=j}^{t-1} \gamma_i\right) \leq t^{-\kappa} \sum_{j=0}^{t-1} \exp(-Bt^{1-\rho} + Bj^{1-\rho}) = \frac{\sum_{j=0}^{t-1} \exp(Bj^{1-\rho})}{t^\kappa \exp(Bt^{1-\rho})}.$$

By Stolz-Cesàro theorem, we have

$$\begin{aligned} \frac{\sum_{j=0}^{t-1} \exp(Bj^{1-\rho})}{t^\kappa \exp(Bt^{1-\rho})} &\asymp \frac{\exp(Bt^{1-\rho})}{(t+1)^\kappa \exp(B(t+1)^{1-\rho}) - t^\kappa \exp(Bt^{1-\rho})} \\ &= \frac{1}{(t+1)^\kappa \exp[B((t+1)^{1-\rho} - t^{1-\rho})] - t^\kappa} \\ &= \frac{1}{(t+1)^\kappa \exp[B(1-\rho)(t+1)^{-\rho} + o(t^{-\rho})] - t^\kappa} \\ &= \frac{1}{(t+1)^\kappa [1 + B(1-\rho)(t+1)^{-\rho} + o(t^{-\rho})] - t^\kappa} \\ &= \frac{1}{B(1-\rho)(t+1)^{\kappa-\rho} + o((t+1)^{\kappa-\rho})} \\ &\rightarrow 0, \end{aligned}$$

as  $t \rightarrow \infty$ . The proof is complete.  $\square$

**Lemma 17.** Suppose  $\gamma_t \asymp t^{-\rho}$  and  $0 < \rho < \kappa \leq 1$ ; let  $\mathbf{A}$  be a positive definite symmetric matrix. Consider the matrix recursion in [Polyak and Juditsky, 1992, Lemma 1],

$$\mathbf{X}_j^j = \mathbf{I}, \quad \mathbf{X}_j^{t+1} = \mathbf{X}_j^t - \gamma_t \mathbf{A} \mathbf{X}_j^t, \quad (j \in \mathbb{N}^+)$$

and define

$$\bar{\mathbf{X}}_j^t = \gamma_j \sum_{i=j}^{t-1} \mathbf{X}_j^i, \quad \Phi_j^t = \mathbf{A}^{-1} - \bar{\mathbf{X}}_j^t.$$

Then the following limit holds,

$$\lim_{t \rightarrow \infty} \frac{1}{t^\kappa} \sum_{j=1}^{t-1} \|\Phi_j^t\| = 0.$$

**Remark.** Lemma 17 recovers [Polyak and Juditsky, 1992, Lemma 1] as the special case  $\kappa = 1$ .

**Proof of Lemma 17** Modeling after Polyak and Juditsky [1992]'s proof of their Lemma 1, we define  $\mathbf{S}_j^t = \sum_{i=j}^{t-1} (\gamma_i - \gamma_j) \mathbf{X}_j^i$ , and we have

$$\Phi_j^t = \mathbf{S}_j^t + \mathbf{A}^{-1} \mathbf{X}_j^t.$$

We will split the proofs into two parts. In the first part, we will prove  $t^{-\kappa} \sum_{j=1}^{t-1} \|\mathbf{S}_j^t\| \rightarrow 0$  and then in the second part we will prove  $t^{-\kappa} \sum_{j=1}^{t-1} \|\mathbf{X}_j^t\| \rightarrow 0$ .

**Part I.** We first prove that  $t^{-\kappa} \sum_{j=1}^{t-1} \|\mathbf{S}_j^t\| \rightarrow 0$ .

By the Part 3 of [Polyak and Juditsky \[1992, Lemma 1\]](#)<sup>5</sup>, there exist some  $\lambda > 0$  and  $K < \infty$  such that

$$\|\mathbf{X}_j^t\| \leq K \exp\left(-2\lambda \sum_{i=j}^{t-1} \gamma_i\right) = K e^{-2\lambda m_j^t}, \quad (\text{B.9})$$

where  $m_k^\ell$  stands for  $\sum_{i=k}^{\ell-1} \gamma_i$ . Now we have

$$\begin{aligned} \|\mathbf{S}_j^t\| &= \left\| \sum_{i=1}^t (\gamma_i - \gamma_j) \mathbf{X}_j^i \right\| \\ &= \left\| \sum_{i=1}^t \left[ \sum_{k=j}^{i-1} (\gamma_{k+1} - \gamma_k) \right] \mathbf{X}_j^i \right\| \\ &\leq C_0 \sum_{i=j}^t \sum_{k=j}^{i-1} k^{-\rho-1} \exp(-2\lambda m_j^i) \\ &\leq C_0 j^{-1} \sum_{i=j}^t \sum_{k=j}^{i-1} k^{-\rho} \exp(-2\lambda m_j^i) \\ &\leq C_1 j^{-1} \sum_{i=j}^t m_j^i \exp(-2\lambda m_j^i) \\ &= C_1 j^{-1} \sum_{i=j}^t \frac{m_j^i e^{-2\lambda m_j^i} (m_j^i - m_j^{i-1})}{\gamma_i}, \end{aligned} \quad (\text{B.10})$$

where  $C_0, C_1$  are some positive constants.

Since the function  $f_w(x) = x^\rho \exp(-wx^{1-\rho})$  is bounded on  $x \in [1, \infty)$  for every  $w > 0$ , we have

$$\frac{j^{-\rho}}{\gamma_i} \exp(-\lambda m_j^i) \leq C_2 i^\rho j^{-\rho} \exp(-C_3(i^{1-\rho} - j^{1-\rho})) = C_2 f_{C_3}(i) / f_{C_3}(j) \leq C_4,$$

for some positive constants  $C_2, C_3$  and  $C_4$ . Hence, continuing upon [\(B.10\)](#),

$$\|\mathbf{S}_j^t\| \leq C_1 C_4 j^{\rho-1} \sum_{i=j}^t m_j^i e^{-\lambda m_j^i} (m_j^i - m_j^{i-1}).$$

Since the summation  $\sum_{i=j}^t m_j^i e^{-\lambda m_j^i} (m_j^i - m_j^{i-1})$  approximates  $\int_0^{m_j^t} m e^{-\lambda m} dm$ , it is bounded. Hence, for some positive constant  $C_5$ ,

$$\|\mathbf{S}_j^t\| \leq C_5 j^{\rho-1},$$

which implies the desired limit

$$\lim_{t \rightarrow \infty} t^{-\kappa} \sum_{j=1}^{t-1} \|\mathbf{S}_j^t\| = 0.$$

**Part II.** It remains to prove that  $t^{-\kappa} \sum_{j=1}^{t-1} \|\mathbf{X}_j^t\| \rightarrow 0$ .

Combining [\(B.9\)](#) and [Lemma 16](#), we have  $t^{-\kappa} \sum_{j=1}^{t-1} \|\mathbf{X}_j^t\| \rightarrow 0$ . Hence the proof of this lemma is complete.  $\square$

**Lemma 18.** *Given the assumption of [Theorem 5](#) or [Theorem 6](#),*

$$\frac{\boldsymbol{\xi}_1 + \dots + \boldsymbol{\xi}_t}{t^{1/\alpha}} \xrightarrow[t \rightarrow \infty]{\mathcal{D}} \mu.$$

<sup>5</sup>We can directly use this inequality since our assumption on step-size  $\gamma_t \asymp t^{-\rho}$ ,  $0 < \rho < 1$  can meet [Polyak and Juditsky \[1992, Assumption 2.2\]](#).



**Proof.** We recall the decomposition  $\boldsymbol{\xi}_t = \boldsymbol{\zeta}_t + \mathbf{m}_t$ , where  $\{\boldsymbol{\zeta}_t\}$  are i.i.d. and  $\boldsymbol{\zeta}_1$  is in the domain of normal attraction of an  $n$ -dimensional centered  $\alpha$ -stable distribution so that

$$\frac{\boldsymbol{\zeta}_1 + \dots + \boldsymbol{\zeta}_t}{t^{1/\alpha}} \xrightarrow[t \rightarrow \infty]{\mathcal{D}} \mu.$$

Hence, it suffices to show that  $t^{-1/\alpha}(\mathbf{m}_1 + \dots + \mathbf{m}_t) \rightarrow 0$  in  $L^r$ , for some  $r \geq 1$ .

By (3.3), there exists a constant  $C > 0$  such that

$$\mathbb{E} \left[ |\mathbf{m}_{t+1}(\mathbf{x}_t)|^2 \mid \mathcal{F}_t \right] \leq K(1 + |\mathbf{x}_t|^2) \leq K(1 + 2|\mathbf{x}^*|^2 + 2|\boldsymbol{\delta}_t|^2) \leq C(1 + |\boldsymbol{\delta}_t|^2).$$

Hence, by using the ‘‘Remark’’ on p.151 of Neveu [1975] (cf. inequalities (20) of Anantharam and Borkar [2012]), we get

$$\begin{aligned} \mathbb{E} \left[ \left| \frac{\mathbf{m}_1 + \dots + \mathbf{m}_t}{t^{1/\alpha}} \right|^r \right] &\leq \frac{C_1}{t^{r/\alpha}} \mathbb{E} \left[ \left( \sum_{i=1}^t \mathbb{E}[|\mathbf{m}_i|^2 \mid \mathcal{F}_{i-1}] \right)^{r/2} \right] \\ &\leq \frac{C_2}{t^{r/\alpha}} \mathbb{E} \left[ \left( \sum_{i=1}^t (1 + |\boldsymbol{\delta}_{i-1}|^2) \right)^{r/2} \right] \\ &\leq \frac{C_2}{t^{r/\alpha}} \mathbb{E} \left[ t^{r/2} + \sum_{i=1}^t |\boldsymbol{\delta}_{i-1}|^r \right], \end{aligned} \quad (\text{B.11})$$

where, for the last inequality, we use the fact that  $(x + y)^s \leq x^s + y^s$  for any  $x, y \geq 0$ ,  $0 \leq s \leq 1$ . If the assumption of Theorem 5 holds, take  $r = p > (\alpha + \alpha\rho)/(1 + \alpha\rho)$  in the inequalities (B.11) above. Then, by Theorem 3,  $\mathbb{E}[|\boldsymbol{\delta}_t|^r] = \mathcal{O}(t^{-\rho(r-1)}) = o(t^{r/\alpha-1})$ .

If the assumption of Theorem 6 holds, take  $r = q > 1/\rho > \alpha/(1 + \rho(\alpha - 1))$  in the inequalities (B.11) above. Then by Corollary 4,  $\mathbb{E}[|\boldsymbol{\delta}_t|^r] = \tilde{\mathcal{O}}(t^{-\rho r(\alpha-1)/\alpha}) = o(t^{r/\alpha-1})$ .

In both cases,  $t^{-1/\alpha}(\mathbf{m}_1 + \dots + \mathbf{m}_t) \rightarrow 0$  in  $L^r$ . The proof is complete.  $\square$

Finally, we are ready to prove Theorems 5 and 6.

**Proof of Theorem 5** By Polyak and Juditsky [1992, Lemma 2]:

$$\frac{t}{t^{1/\alpha}} \bar{\boldsymbol{\delta}}_t = \underbrace{\frac{1}{t^{1/\alpha}} \mathbf{F}_t \boldsymbol{\delta}_0}_{\mathbf{I}_t^{(1)}} - \underbrace{\frac{1}{t^{1/\alpha}} \sum_{j=1}^{t-1} \mathbf{A}^{-1} \boldsymbol{\xi}_j}_{\mathbf{I}_t^{(2)}} - \underbrace{\frac{1}{t^{1/\alpha}} \sum_{j=1}^{t-1} \mathbf{W}_j^t \boldsymbol{\xi}_j}_{\mathbf{I}_t^{(3)}}, \quad (\text{B.12})$$

where  $\mathbf{F}_t$  and  $\mathbf{W}_j^t$  are deterministic matrices with uniformly bounded operator 2-norms defined as

$$\mathbf{F}_t = \sum_{i=0}^{t-1} \prod_{k=1}^i (\mathbf{I} - \gamma_k \mathbf{A}), \quad (\text{B.13})$$

$$\mathbf{W}_j^t = \gamma_j \sum_{i=j}^{t-1} \prod_{k=j+1}^i (\mathbf{I} - \gamma_k \mathbf{A}) - \mathbf{A}^{-1}. \quad (\text{B.14})$$

We have  $\mathbf{I}_t^{(1)} \rightarrow 0$  by the boundedness of  $\mathbf{F}_t$ . Next, take some  $\kappa$  such that

$$\max(\rho, 1/\alpha) < \kappa \leq p/\alpha. \quad (\text{B.15})$$

We shall prove that  $\mathbf{I}_t^{(3)} \rightarrow 0$  in  $L^{\alpha\kappa}$  (notice that  $1 < \alpha\kappa \leq p < \alpha$ ; cf. Polyak and Juditsky [1992, Proof of Theorem 1] where convergence in  $L^2$  is proven). By Theorem 3,  $\sup_j \mathbb{E}[|\boldsymbol{\xi}_j|^p] < \infty$ . Hence

we can compute, by virtue of Lemma 7, that

$$\begin{aligned}\mathbb{E}\left[\left|\mathbf{I}_t^{(3)}\right|^{\alpha\kappa}\right] &= \mathbb{E}\left[\left|\frac{1}{t^{1/\alpha}}\sum_{j=1}^{t-1}\mathbf{W}_j^t\xi_j\right|^{\alpha\kappa}\right] \leq \frac{C_0}{t^\kappa}\sum_{j=1}^{t-1}\mathbb{E}\left[\left|\mathbf{W}_j^t\xi_j\right|^{\alpha\kappa}\right] \\ &\leq \left(\frac{C_0}{t^\kappa}\sum_{j=1}^{t-1}\|\mathbf{W}_j^t\|^{\alpha\kappa}\right)\sup_j\mathbb{E}\left[\left|\xi_j\right|^{\alpha\kappa}\right] \leq \left(\frac{C_0}{t^\kappa}\sum_{j=1}^{t-1}\|\mathbf{W}_j^t\|\right)\sup_j\mathbb{E}\left[\left|\xi_j\right|^{\alpha\kappa}\right] \\ &\leq \frac{C_1}{t^\kappa}\sum_{j=1}^{t-1}\|\mathbf{W}_j^t\|.\end{aligned}$$

Notice that the matrices  $\mathbf{W}_j^t$  defined above correspond to  $-\Phi_j^t$  in Lemma 17. This infers that  $\mathbb{E}\left[\left|\mathbf{I}_t^{(3)}\right|^{\alpha\kappa}\right] \leq \frac{K_1}{t^\kappa}\sum_{j=1}^{t-1}\|\mathbf{W}_j^t\| \rightarrow 0$  as  $t \rightarrow \infty$ .

Finally, Lemma 18 states that  $\mathbf{I}_t^{(2)}$  converges weakly to an  $\alpha$ -stable distribution. Hence we conclude the proof.  $\square$

**Proof of Theorem 6** Denote by  $\mathbf{A}$  the Hessian matrix  $\nabla\mathbf{R}(\mathbf{x}^*) = \nabla^2 f(\mathbf{x}^*)$ . Consider a corresponding linear SA process with the same noise,

$$\mathbf{x}_{t+1}^1 = \mathbf{x}_t^1 - \gamma_{t+1}(\mathbf{A}(\mathbf{x}_t^1 - \mathbf{x}^*) + \xi_{t+1}(\mathbf{x}_t)), \quad (\text{B.16})$$

with  $\mathbf{x}_0^1 = \mathbf{x}_0$ . We further define  $\delta_t^1 = \mathbf{x}_t^1 - \mathbf{x}^*$  and the averaging process  $\bar{\delta}_t^1 = (\delta_0^1 + \dots + \delta_{t-1}^1)/t$ .

**Part I.** We first prove that  $t^{1-1/\alpha}(\bar{\delta}_t^1 - \bar{\delta}_t) \rightarrow 0$  almost surely.

By (B.12), we have

$$\frac{t}{t^{1/\alpha}}\bar{\delta}_t^1 = \frac{1}{t^{1/\alpha}}\mathbf{F}_t\delta_0 - \frac{1}{t^{1/\alpha}}\sum_{j=1}^{t-1}(\mathbf{A}^{-1} + \mathbf{W}_j^t)\xi_j, \quad (\text{B.17})$$

where the matrices  $\mathbf{F}_t$  and  $\mathbf{W}_j^t$  are defined back in (B.13) and (B.14). For the non-linear process (2.1), it can be viewed as if it is a linear process with the  $j$ -th noise term being  $\xi_j + \mathbf{R}(\mathbf{x}_{j-1}) - \mathbf{A}\delta_{j-1}$ . Hence by (B.12), we have

$$\frac{t}{t^{1/\alpha}}\bar{\delta}_t = \frac{1}{t^{1/\alpha}}\mathbf{F}_t\delta_0 - \frac{1}{t^{1/\alpha}}\sum_{j=1}^{t-1}(\mathbf{A}^{-1} + \mathbf{W}_j^t)(\xi_j + \mathbf{R}(\mathbf{x}_{j-1}) - \mathbf{A}\delta_{j-1}). \quad (\text{B.18})$$

Combining (B.17) and (B.18) yields the difference (cf. Part 4 of Polyak and Juditsky [1992, Proof of Theorem 2])

$$\frac{t}{t^{1/\alpha}}(\bar{\delta}_t^1 - \bar{\delta}_t) = \frac{1}{t^{1/\alpha}}\sum_{j=1}^{t-1}(\mathbf{A}^{-1} + \mathbf{W}_j^t)(\mathbf{R}(\mathbf{x}_{j-1}) - \mathbf{A}\delta_{j-1}). \quad (\text{B.19})$$

We also recall the assumption that  $|\mathbf{R}(\mathbf{x}_j) - \mathbf{A}\delta_j| \leq K|\delta_j|^q$ . Hence, it suffices to show the following term vanishes almost surely as  $t \rightarrow \infty$ :

$$J_t = \frac{1}{t^{1/\alpha}}\sum_{j=1}^{t-1}|\delta_j|^q.$$

To show this, first by our calculation of the rate of convergence in Corollary 4,

$$\mathbb{E}\left[\sum_{j=1}^{t-1}\frac{1}{j^{1/\alpha}}|\delta_j|^q\right] = \sum_{j=1}^{t-1}\tilde{\mathcal{O}}\left(j^{-\rho q\frac{\alpha-1}{\alpha}-\frac{1}{\alpha}}\right) = \mathcal{O}(1).$$

The last equality holds since  $-\rho q\frac{\alpha-1}{\alpha}-\frac{1}{\alpha} < -1$ . Hence, we have

$$\mathbb{P}\left[\sum_{j=1}^{t-1}\frac{1}{j^{1/\alpha}}|\delta_j|^q < \infty\right] = 1. \quad (\text{B.20})$$

By Kronecker's lemma, (B.20) implies that  $\mathbb{P}[\lim_{t \rightarrow \infty} J_t = 0] = 1$ . This further implies that the left hand side of (B.19),  $t^{1-1/\alpha}(\bar{\delta}_t^1 - \bar{\delta}_t)$ , converges to 0 almost surely.

**Part II.** It remains to show that  $t^{1-1/\alpha}\bar{\delta}_t^1$  converges weakly to an  $\alpha$ -stable distribution.

Define  $\bar{x}_t^1 = (x_0^1 + \dots + x_{t-1}^1)/t$ . Since  $t^{1-1/\alpha}(\bar{x}_t^1 - \bar{x}_t) = t^{1-1/\alpha}(\bar{\delta}_t^1 - \bar{\delta}_t) \rightarrow 0$  almost surely, it follows *a fortiori* that  $\bar{x}_t^1 - \bar{x}_t \rightarrow 0$  almost surely. Hence  $x_t^1 - x_t \rightarrow 0$  almost surely, due to the well-known theorem that a real-valued sequence converges to zero if and only if the average sequence converges to zero.

Therefore, for the noise decomposition  $\xi_{t+1}(x_t) = \zeta_{t+1} + m_{t+1}(x_t)$ , the state-dependent component  $m_{t+1}(x_t)$  satisfies not only (3.3), i.e.,

$$\mathbb{E}[|m_{t+1}(x_t)|^2 \mid \mathcal{F}_t] \leq K(1 + |x_t|^2),$$

but also

$$\mathbb{E}[|m_{t+1}(x_t)|^2 \mid \mathcal{F}_t] \leq C(1 + |x_t^1|^2).$$

Hence, combining the discussion above and Lemma 18, we know that the linear recursion (B.16) defines a process that satisfies Theorem 5. (The only difference is that  $\kappa$ , instead of (B.15), can be taken from the range  $(\rho, 1)$  under the assumption of the current theorem, since by Theorem 3,  $\sup_{t \in \mathbb{N}^+} \mathbb{E}[|\xi_t|^p] < \infty$  for every  $1 \leq p < \alpha$ .) It then follows from Theorem 5 that  $t^{1-1/\alpha}\bar{\delta}_t^1$  converges weakly to an  $\alpha$ -stable distribution.

The proof is complete.  $\square$

## C Additional Technical Background

### C.1 Properties of $\alpha$ -Stable Distributions

An  $\alpha$ -stable distributed random variable  $X$  is denoted by  $X \sim \mathcal{S}_\alpha(\sigma, \theta, \mu)$ , where  $\alpha \in (0, 2]$  is the *tail-index*,  $\theta \in [-1, 1]$  is the *skewness* parameter,  $\sigma \geq 0$  is the *scale* parameter, and  $\mu \in \mathbb{R}$  is called the *location* parameter. An  $\alpha$ -stable random variable  $X$  is uniquely characterized by its characteristic function:  $\mathbb{E}[\exp(iuX)] = e^{-\sigma^\alpha |u|^\alpha (1 - i\theta \operatorname{sgn}(u) \tan(\frac{\pi\alpha}{2})) + i\mu u}$ , if  $\alpha \neq 1$  and  $\mathbb{E}[\exp(iuX)] = e^{-\sigma |u|(1 + i\theta \frac{2}{\pi} \operatorname{sgn}(u) \log |u|) + i\mu u}$ , if  $\alpha = 1$ , for any  $u \in \mathbb{R}$ . The mean of  $X$  coincides with  $\mu$  if  $\alpha > 1$ , and otherwise the mean of  $X$  is undefined. The skewness parameter  $\theta$  is a measure of asymmetry. We say that  $X$  follows a *symmetric*  $\alpha$ -stable distribution denoted as  $\mathcal{S}_\alpha \mathcal{S}(\sigma) = \mathcal{S}_\alpha(\sigma, 0, 0)$  if  $\theta = 0$  (and  $\mu = 0$ ). The tail-index parameter  $\alpha \in (0, 2]$  determines the tail thickness of the distribution, and  $\sigma > 0$  measures the spread of  $X$  around its mode. When  $\alpha < 2$ ,  $\alpha$ -stable distributions have heavy tails so that their moments are finite only up to the order  $\alpha$ . More precisely, let  $X \sim \mathcal{S}_\alpha(\sigma, \theta, \mu)$  with  $0 < \alpha < 2$ . Then  $\mathbb{E}[|X|^p] < \infty$  for any  $0 < p < \alpha$  and  $\mathbb{E}[|X|^p] = \infty$  for any  $p \geq \alpha$ , which implies infinite variance (see e.g. [Samorodnitsky and Taqqu, 1994, Property 1.2.16]). When  $0 < \alpha < 2$ , the left tail and right tail of  $X$  are described by the formulas:

$$\lim_{x \rightarrow \infty} x^\alpha \mathbb{P}(X > x) = \frac{1 + \theta}{2} C_\alpha \sigma^\alpha, \quad \lim_{x \rightarrow \infty} x^\alpha \mathbb{P}(X < -x) = \frac{1 - \theta}{2} C_\alpha \sigma^\alpha,$$

where  $C_\alpha := (1 - \alpha)/(\Gamma(2 - \alpha) \cos(\pi\alpha/2))$  if  $\alpha \neq 1$  and  $C_\alpha := 2/\pi$  if  $\alpha = 1$ , (see e.g. [Samorodnitsky and Taqqu, 1994, Property 1.2.15]). The family of  $\alpha$ -stable distributions include normal, Lévy and Cauchy distributions as special cases, and can be used to model many complex stochastic phenomena [Sarafrazi and Yazdi, 2019, Fiche et al., 2013, Farsad et al., 2015].

### C.2 Domains of Attraction of Stable Distributions

Let  $X_i$  be an i.i.d. sequence with a common distribution whose distribution function is denoted as  $F$ , and let  $S_n := X_1 + X_2 + \dots + X_n$ . Suppose that for some normalizing constants  $a_n > 0$  and  $b_n$ , the sequence  $S_n/a_n - b_n$  has a non-degenerate limit distribution with distribution function  $G$ , i.e.

$$\lim_{n \rightarrow \infty} \mathbb{P}(S_n/a_n - b_n \leq x) = G(x), \quad (\text{C.1})$$

for all continuity points  $x$  of  $G$ , then such limit distributions  $G$  are stable distributions and the set of distribution functions  $F$  such that  $S_n/a_n - b_n$  converges to a particular stable distribution is called its *domain of attraction*.

Next, let us provide a sufficient and necessary condition for being in the domain of attraction of a stable distribution. The class of distribution functions  $F$  for which  $S_n/a_n - b_n$  converges to  $\mathcal{S}_\alpha\mathcal{S}(\sigma)$  is called the  $\alpha$ -stable domain of attraction, and we denote it as  $F \in D_\alpha$ . Before we proceed, let us recall that a positive measurable function  $f$  is *regularly varying* if there exists a constant  $\gamma \in \mathbb{R}$  such that  $\lim_{t \rightarrow \infty} \frac{f(tx)}{f(t)} = x^\gamma$ , for every  $x > 0$ . In this case, we denote  $f \in RV_\gamma$ , and we say a function  $f$  is slowly varying if  $f \in RV_0$ .

Define the characteristic functions  $\phi(u) := \int_{-\infty}^{\infty} e^{iux} dF(x)$  and  $\psi(u) := \int_{-\infty}^{\infty} e^{iux} dG(x)$ , and also define  $\lambda(u) := \phi(1/u)$  and  $g(u) := \psi(1/u)$  for  $u \in [-\infty, \infty] \setminus \{0\}$ . We also denote  $U(x) := \operatorname{Re}\lambda(x)$  and  $V(x) := \operatorname{Im}\lambda(x)$ . By Lévy's continuity theorem for characteristic functions (see e.g. [Feller \[1971, Chapter XV.3\]](#)), the convergence in (C.1) is equivalent to  $\lim_{n \rightarrow \infty} \exp(-ib_n/u) \lambda^n(a_n u) = g(u)$ ,  $u \in [-\infty, \infty] \setminus \{0\}$  uniformly on neighborhoods of  $\pm\infty$ . Based on this, one can show that (see e.g. ) if (C.1) holds, then  $|g(u)|^2 = \exp(-c|u|^{-\alpha})$  for some  $\alpha \in (0, 2]$  and  $c > 0$  and moreover  $-\log|\lambda| \in RV_{-\alpha}$ , i.e.  $-\log|\lambda|$  is regularly varying with index  $-\alpha$ . Next, we state a sufficient and necessary condition for being in the  $\alpha$ -stable domain of attraction.

**Theorem 19** ([Geluk and de Hann \[2000\]](#), Theorem 1). *Suppose  $0 < \alpha < 2$ . Every  $\alpha$ -stable random variable  $X$  has a characteristic function of the form:*

$$\mathbb{E}[\exp(iuX)] = \exp\left(-\left\{|u|^\alpha + iu(2p-1)\{(1-\alpha)\tan(\alpha\pi/2)\}\frac{|u|^{\alpha-1}-1}{\alpha-1}\right\}\right),$$

for some  $0 \leq p \leq 1$  with  $(1-\alpha)\tan(\pi/2)$  defined to be  $2/\pi$  at  $\alpha = 1$ . The following statements are equivalent:

(i)  $F \in D_\alpha$ .

(ii)  $1 - F(x) + F(-x) \in RV_{-\alpha}$  and there exists a constant  $p \in [0, 1]$  such that

$$\lim_{x \rightarrow \infty} \frac{1 - F(x)}{1 - F(x) + F(-x)} = p.$$

(iii)  $1 - U(x) \in RV_{-\alpha}$  and there exists a constant  $p \in [0, 1]$  such that

$$\lim_{x \rightarrow \infty} \frac{xuV(xu) - xV(x)}{x(1 - U(x))} = (2p-1)(1-\alpha)\tan\left(\frac{\alpha\pi}{2}\right)\frac{|u|^{1-\alpha}-1}{1-\alpha}, \quad u \in \mathbb{R} \setminus \{0\}.$$

Furthermore, [[Geluk and de Hann, 2000](#), Theorem 1] showed that if any of (i), (ii), (iii) holds, then  $\lim_{x \rightarrow \infty} \frac{1 - U(x)}{1 - F(x) + F(-x)} = \Gamma(1-\alpha)\cos(\alpha\pi/2)$  and  $\lim_{x \rightarrow \infty} \frac{V(x) - x^{-1} \int_0^x (1-F(y) - F(-y))dy}{1 - F(x) + F(-x)} = (2p-1)\left(\Gamma(1-\alpha)\sin(\alpha\pi/2) - \frac{1}{1-\alpha}\right)$ .

Let us illustrate [[Geluk and de Hann, 2000](#), Theorem 1] with an example of Pareto distribution, which is a power-law distribution widely applied in various fields. A random variable  $X$  is said to follow a Pareto distribution (of type I) if there exists some  $c > 0$  such that  $\mathbb{P}(X > x) = (x/c)^{-\alpha}$  for any  $x \geq c$  and  $\mathbb{P}(X > x) = 1$  for any  $x < c$ . In this case,  $F(x) = 1 - (x/c)^{-\alpha}$  for any  $x \geq c$  and  $F(x) = 0$  for any  $x < c$ . It follows that  $1 - F(x) + F(-x) \in RV_{-\alpha}$  and  $\lim_{x \rightarrow \infty} \frac{1 - F(x)}{1 - F(x) + F(-x)} = 1$ . Therefore,  $F \in D_\alpha$  and the Pareto distribution is in the  $\alpha$ -stable domain of attraction.

When the tail-index  $\alpha \in (0, 2)$ , the logarithm of the characteristic function (i.e.  $\log \mathbb{E}[e^{iuX}]$ ) of an  $\alpha$ -stable random variable  $X$  is of the form (see [[Gnedenko and Kolmogorov, 1954](#), equation (12), page 168]):

$$i\gamma u + c_1 \int_{-\infty}^0 \left[ e^{iux} - 1 - \frac{iux}{1+x^2} \right] \frac{dx}{|x|^{1+\alpha}} + c_2 \int_0^{\infty} \left[ e^{iux} - 1 - \frac{iux}{1+x^2} \right] \frac{dx}{x^{1+\alpha}}, \quad (\text{C.2})$$

where  $c_1, c_2 \geq 0$  and  $\gamma \in \mathbb{R}$ . Since the characteristic function uniquely characterizes a probability distribution, the triplet  $(c_1, c_2, \alpha)$  uniquely determines an  $\alpha$ -stable law up to a constant shift  $\gamma \in \mathbb{R}$  when  $0 < \alpha < 2$ . [[Gnedenko and Kolmogorov, 1954](#), Theorem 2, page 175] provides another

sufficient and necessary condition for being in the domain of attraction of an  $\alpha$ -stable distribution, which complements [Geluk and de Hann, 2000, Theorem 1]. Suppose  $0 < \alpha < 2$ . Then, the distribution function  $F(x)$  belongs to the domain of attraction of an  $\alpha$ -stable distribution if and only if the following conditions hold: (i)  $\lim_{x \rightarrow \infty} \frac{F(-x)}{1-F(x)} = \frac{c_1}{c_2}$ . (ii) For every constant  $\kappa > 0$ ,  $\lim_{x \rightarrow \infty} \frac{1-F(x)+F(-x)}{1-F(\kappa x)+F(-\kappa x)} = \kappa^\alpha$ . In the case of a Pareto distribution (of type I), for some  $c > 0$ , we have  $F(x) = 1 - (x/c)^{-\alpha}$  for any  $x \geq c$  and  $F(x) = 0$  for any  $x < c$ . Then we can check that  $\lim_{x \rightarrow \infty} \frac{F(-x)}{1-F(x)} = 0$  and for every constant  $\kappa > 0$ ,  $\lim_{x \rightarrow \infty} \frac{1-F(x)+F(-x)}{1-F(\kappa x)+F(-\kappa x)} = \lim_{x \rightarrow \infty} \frac{(x/c)^{-\alpha}}{(\kappa x/c)^{-\alpha}} = \kappa^\alpha$ . Thus, the Pareto distribution belongs to the domain of attraction of an  $\alpha$ -stable distribution.

Finally, let us provide a sufficient and necessary condition for being in the domain of normal attraction of a stable distribution.

**Theorem 20** (Gnedenko and Kolmogorov [1954], Theorem 5, page 181). *Suppose  $0 < \alpha < 2$ . The distribution function  $F(x)$  belongs to the domain of attraction of an  $\alpha$ -stable distribution characterized by (C.2) if and only if*

$$F(x) = (c_1 a^\alpha + \alpha_1(x)) \frac{1}{|x|^\alpha}, \quad \text{for } x < 0, \quad (\text{C.3})$$

$$F(x) = 1 - (c_2 a^\alpha + \alpha_2(x)) \frac{1}{x^\alpha}, \quad \text{for } x > 0, \quad (\text{C.4})$$

where  $a > 0$  is a positive constant and  $\alpha_1(x), \alpha_2(x)$  are functions satisfying  $\lim_{x \rightarrow -\infty} \alpha_1(x) = \lim_{x \rightarrow \infty} \alpha_2(x) = 0$ . Indeed, the constant  $a$  in (2.2), (C.3) and (C.4) is the same.

In the case of a Pareto distribution (of type I), for some  $c > 0$ , we have  $F(x) = 1 - (x/c)^{-\alpha}$  for any  $x \geq c$  and  $F(x) = 0$  for any  $x < c$ . Then we can check that (C.3) and (C.4) hold with  $c_1 = 0$ ,  $\alpha_1(x) \equiv 0$ ,  $c_2 = 1$ ,  $\alpha_2(x) \equiv 0$  and  $a = c$ . Thus, the Pareto distribution belongs to the domain of normal attraction of an  $\alpha$ -stable distribution.
